# Supplementary material for: Direct intramyocardial injection of VEGF mRNA in patients undergoing coronary artery bypass grafting
Source: PubMed Central journal article supplement — Mol Ther. 2022 Dec 17;31(3):866–74. doi: 10.1016/j.ymthe.2022.11.017 (PMC10014220; doi:10.1016/j.ymthe.2022.11.017), 2022-12-17
Supplement: mmc2.pdf [file mmc2.pdf]

## SUPPLEMENTARY TABLES

**Table S2. Treatment-emergent changes in clinical laboratory parameters.**

| Treatment-emergent change from normal baseline value to abnormal value in evaluable patients | AZD8601 3 mg ( <i>n</i> = 7),<br><i>n/n</i> (%) | Placebo ( <i>n</i> = 4),<br><i>n/n</i> (%)   |
|----------------------------------------------------------------------------------------------|-------------------------------------------------|----------------------------------------------|
| <b>Hematology</b>                                                                            |                                                 |                                              |
| Leucocytes, 10 <sup>9</sup> /L                                                               | Increase: 3/6 (50.0)                            | Increase: 2/4 (50.0)                         |
| Neutrophils, 10 <sup>9</sup> /L                                                              | Increase: 2/5 (40.0)                            | Increase: 1/4 (25.0)                         |
| Lymphocytes, 10 <sup>9</sup> /L                                                              | Increase: 1/5 (20.0)<br>Decrease: 3/5 (60.0)    | 0/4 (0)                                      |
| Monocytes, 10 <sup>9</sup> /L                                                                | Increase: 1/5 (20.0)                            | Increase: 1/4 (25.0)                         |
| Eosinophils, 10 <sup>9</sup> /L                                                              | Increase: 1/5 (20.0)                            | Decrease: 1/4 (25.0)                         |
| Basophils, 10 <sup>9</sup> /L                                                                | Increase: 1/5 (20.0)                            | 0/4 (0)                                      |
| Hemoglobin, g/L                                                                              | Decrease: 5/6 (83.3)                            | Decrease: 3/4 (75.0)                         |
| Erythrocyte volume fraction, ratio                                                           | Decrease: 5/6 (83.3)                            | Decrease: 4/4 (100)                          |
| Erythrocyte mean cell volume, fL                                                             | Increase: 1/6 (16.7)                            | 0/4 (0)                                      |
| Mean cell hemoglobin, pg                                                                     | 0/6 (0)                                         | 0/4 (0)                                      |
| Mean cell hemoglobin concentration, pg                                                       | 0/6 (0)                                         | 0/4 (0)                                      |
| Reticulocytes, 10 <sup>9</sup> /L                                                            | Increase: 2/5 (40.0)                            | 0/3 (0)                                      |
| Platelets, 10 <sup>9</sup> /L                                                                | Increase: 1/6 (16.7)<br>Decrease: 3/6 (50.0)    | Increase: 1/4 (25.0)<br>Decrease: 1/4 (25.0) |
| <b>Coagulation</b>                                                                           |                                                 |                                              |
| Prothrombin complex, international normalized ratio                                          | 0/4 (0)                                         | 0/4 (0)                                      |
| Activated partial thromboplastin time, s                                                     | 0/4 (0)                                         | Increase: 2/4 (50.0)<br>Decrease: 1/4 (25.0) |
| Fibrinogen, g/L                                                                              | Increase: 3/3 (100)                             | Increase: 3/3 (100)                          |
| <b>Biochemistry</b>                                                                          |                                                 |                                              |
| Sodium, mmol/L                                                                               | Decrease: 1/6 (16.7)                            | Decrease: 1/4 (25.0)                         |
| Potassium, mmol/L                                                                            | Increase: 1/6 (16.7)<br>Decrease: 1/6 (16.7)    | 0/4 (0)                                      |
| Urea, mmol/L                                                                                 | 0/4 (0)                                         | 0/4 (0)                                      |
| Creatinine, μmol/L                                                                           | 0/5 (0)                                         | Increase: 1/4 (25.0)                         |
| Albumin, g/L                                                                                 | Decrease: 3/5 (60.0)                            | Decrease: 3/4 (75.0)                         |
| Calcium, mmol/L                                                                              | Decrease: 2/5 (40.0)                            | Decrease: 4/4 (100)                          |
| Phosphate, mmol/L                                                                            | Decrease: 2/4 (50.0)                            | Decrease: 2/4 (50.0)                         |
| Alkaline phosphatase, ukat/L                                                                 | Increase: 1/5 (20.0)                            | Decrease: 1/4 (25.0)                         |
| Alanine aminotransferase, ukat/L                                                             | 0/5 (0)                                         | Increase: 1/4 (25.0)                         |
| Aspartate aminotransferase, ukat/L                                                           | 0/5 (0)                                         | Increase: 1/4 (25.0)                         |
| Total bilirubin, μmol/L                                                                      | Increase: 1/5 (20.0)                            | 0/4 (0)                                      |
