# Supplementary material for: Direct intramyocardial injection of VEGF mRNA in patients undergoing coronary artery bypass grafting
Source: PubMed Central journal article supplement — Mol Ther. 2022 Dec 17;31(3):866–74. doi: 10.1016/j.ymthe.2022.11.017 (PMC10014220; doi:10.1016/j.ymthe.2022.11.017), 2022-12-17
Supplement: mmc3.pdf [file mmc3.pdf]

## SUPPLEMENTARY TABLES

**Table S3. Other exploratory outcome analysis results.**

|                                                                              | Ratio vs baseline               |                            | Ratio (95% CI),<br>AZD8601 vs placebo |
|------------------------------------------------------------------------------|---------------------------------|----------------------------|---------------------------------------|
|                                                                              | AZD8601<br>3 mg ( <i>n</i> = 7) | Placebo<br>( <i>n</i> = 4) |                                       |
| <b>Cardiac biomarkers at 6 months</b>                                        |                                 |                            |                                       |
| High-sensitivity troponin T, µg/L                                            | 1.008                           | 1.167                      | 0.86 (0.44, 1.71); <i>P</i> = 0.670   |
| <b>VEGF-A at 1 month</b>                                                     |                                 |                            |                                       |
| VEGF-A plasma concentration, pg/mL                                           | 1.121                           | 1.087                      | 1.03 (0.45, 2.37); <i>P</i> = 0.935   |
| VEGF-A area under the plasma<br>concentration–time curve (0–72 h), pg × h/mL | 4164.481                        | 3830.110                   | 1.09 (0.88, 1.34); <i>P</i> = 0.372   |

Cardiac biomarker data are from a mixed model repeated measures with treatment, visit, and visit-by-treatment interaction as fixed factors, subject as random factor and baseline value as covariate. Two-sided nominal *P*-values are presented.

VEGF-A data are from an analysis of covariance model with treatment as factor and value at randomization as covariate. Two-sided nominal *P*-values are presented.

CI, confidence interval; LS, least-squares; VEGF-A, vascular endothelial growth factor A.
